# Supplementary material for: CutFEM‐based MEG forward modeling improves source separability and sensitivity to quasi‐radial sources: A somatosensory group study
Source: PubMed Central journal article supplement — Hum Brain Mapp. 2024 Aug 14;45(11):e26810. doi: 10.1002/hbm.26810 (PMC11323619; doi:10.1002/hbm.26810), 2024-08-14
Supplement: HBM-45-e26810-s001.pdf [file HBM-45-e26810-s001.pdf]

Supplementary Material for "CutFEM-based  
MEG forward modeling improves source  
separability and sensitivity to semi-radial sources:  
a group study"

5

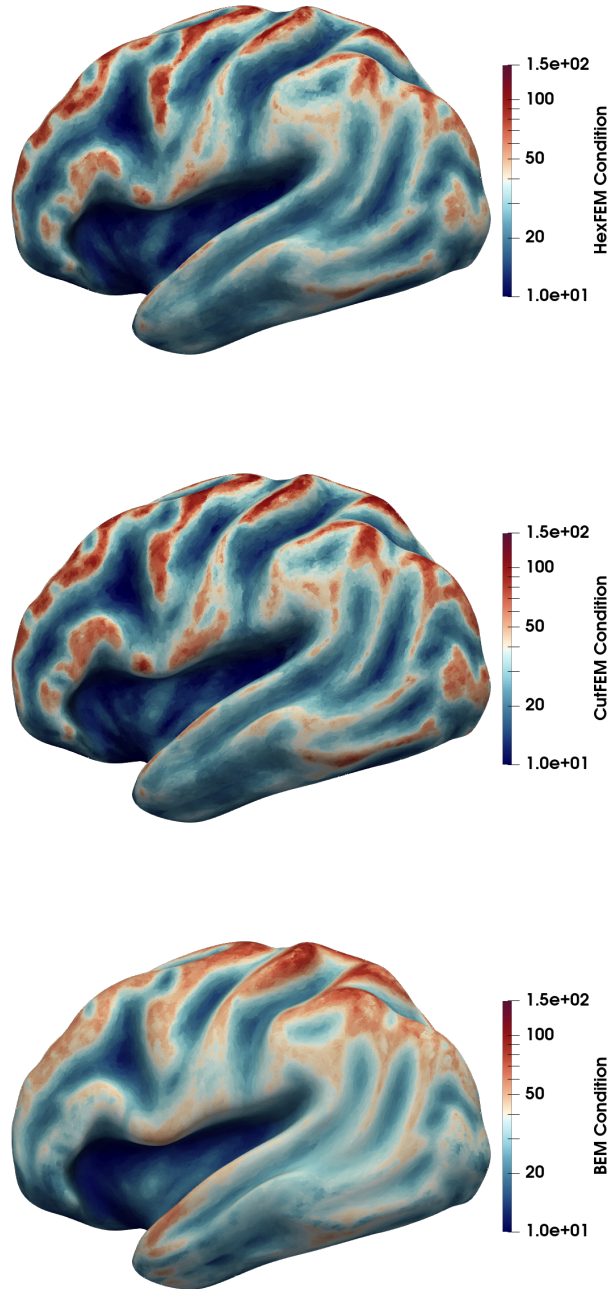

Figure 1: Condition number (ratio of largest to smallest singular value) of the MEG lead field. Top: HexFEM condition; Center: CutFEM condition; Bottom: BEM condition. Logarithmic color map, scaled from 10 to 150.
